# Supplementary material
Source: PubMed Central journal article supplement (PMC6688508)
Supplement: NIHMS1022494-supplement-Supporting_information.pdf [file NIHMS1022494-supplement-Supporting_information.pdf]

## SUPPORTING INFORMATION

### Defining Structure-Functional Selectivity Relationships (SFSR) for a Class of Non-Catechol Dopamine D<sub>1</sub> Receptor Agonists

Michael L. Martini<sup>1,2</sup>, Jing Liu<sup>1</sup>, Caroline Ray<sup>3</sup>, Xufen Yu<sup>1</sup>, Xi-Ping Huang<sup>5</sup>, Aarti Urs<sup>4</sup>, Nikhil Urs<sup>4</sup>, John D. McCorvy<sup>5,6\*</sup>, Marc G. Caron<sup>3,7\*</sup>, Bryan L. Roth<sup>5\*</sup>, and Jian Jin<sup>1\*</sup>

<sup>1</sup>Mount Sinai Center for Therapeutics Discovery, Departments of Pharmacological Sciences and Oncological Sciences, Tisch Cancer Institute, Icahn School of Medicine at Mount Sinai, New York, NY 10029, USA

<sup>2</sup>Medical Scientist Training Program, Icahn School of Medicine at Mount Sinai, New York, NY 10029, USA

<sup>3</sup>Department of Cell Biology, Duke University Medical Center, Durham, NC 27710, USA

<sup>4</sup>Department of Pharmacology and Therapeutics, College of Medicine, University of Florida, Gainesville, FL 32610, USA

<sup>5</sup>Department of Pharmacology and National Institute of Mental Health Psychoactive Drug Screening Program, School of Medicine, University of North Carolina at Chapel Hill, Chapel Hill, North Carolina 27599, USA

<sup>6</sup>Department of Cell Biology, Neurobiology and Anatomy, Medical College of Wisconsin, Milwaukee, WI 53226, USA

<sup>7</sup>Department of Medicine and Neurobiology, Duke University Medical Center, Durham, NC 27710, USA

#### Table of Contents

- A. <sup>1</sup>H NMR spectrum of compound **40** (Figure S1)
- B. <sup>1</sup>H NMR spectrum of compound **41** (Figure S2)
